# Supplementary material for: Synergistic effects of metformin and curcumin on cytotoxicity of chemotherapy drugs using a gastric cancer cell line model
Source: PubMed Central journal article supplement (PMC8678059; doi:10.17179/excli2021-4091), 2021-10-11
Supplement: EXCLI-20-1488-s-001.pdf [file EXCLI-20-1488-s-001.pdf]

**Supplementary information to:**

**Original article:**

**SYNERGISTIC EFFECTS OF METFORMIN AND CURCUMIN ON  
CYTOTOXICITY OF CHEMOTHERAPY DRUGS USING A GASTRIC  
CANCER CELL LINE MODEL**

Ehsan Zarei , Youssof Sefidi-Heris, Iraj Saadat\* 

Department of Biology, College of Sciences, Shiraz University, Shiraz, Iran

\* **Corresponding author:** Iraj Saadat, Department of Biology, College of Sciences,  
Shiraz University, Shiraz 71467-13565, Iran. Tel: +98 71 36137435,  
E-mail: [isaadat@shirazu.ac.ir](mailto:isaadat@shirazu.ac.ir)

<http://dx.doi.org/10.17179/excli2021-4091>

This is an Open Access article distributed under the terms of the Creative Commons Attribution License  
(<http://creativecommons.org/licenses/by/4.0/>).

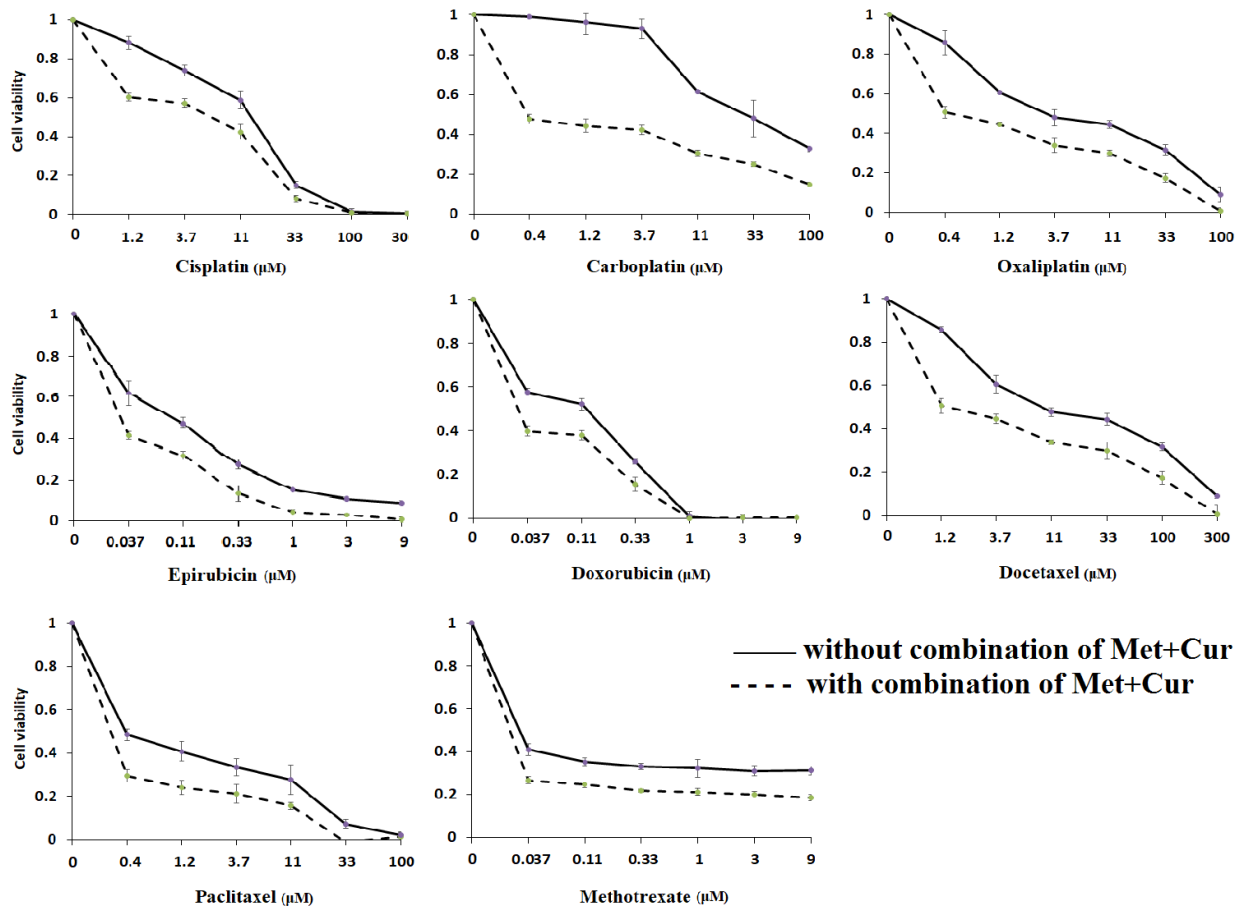

**Supplementary Figure 1:** AGS cell line viability (mean  $\pm$  SD) after treatment with 3-fold serial dilutions of anticancer drugs with or without combination of metformin (Met) 0.625 mM + curcumin (Cur) 1  $\mu\text{M}$  for 72 hours. Met+Cur significantly increases the cytotoxic effects of anticancer drugs. All experiments were carried out independently in triplicate.

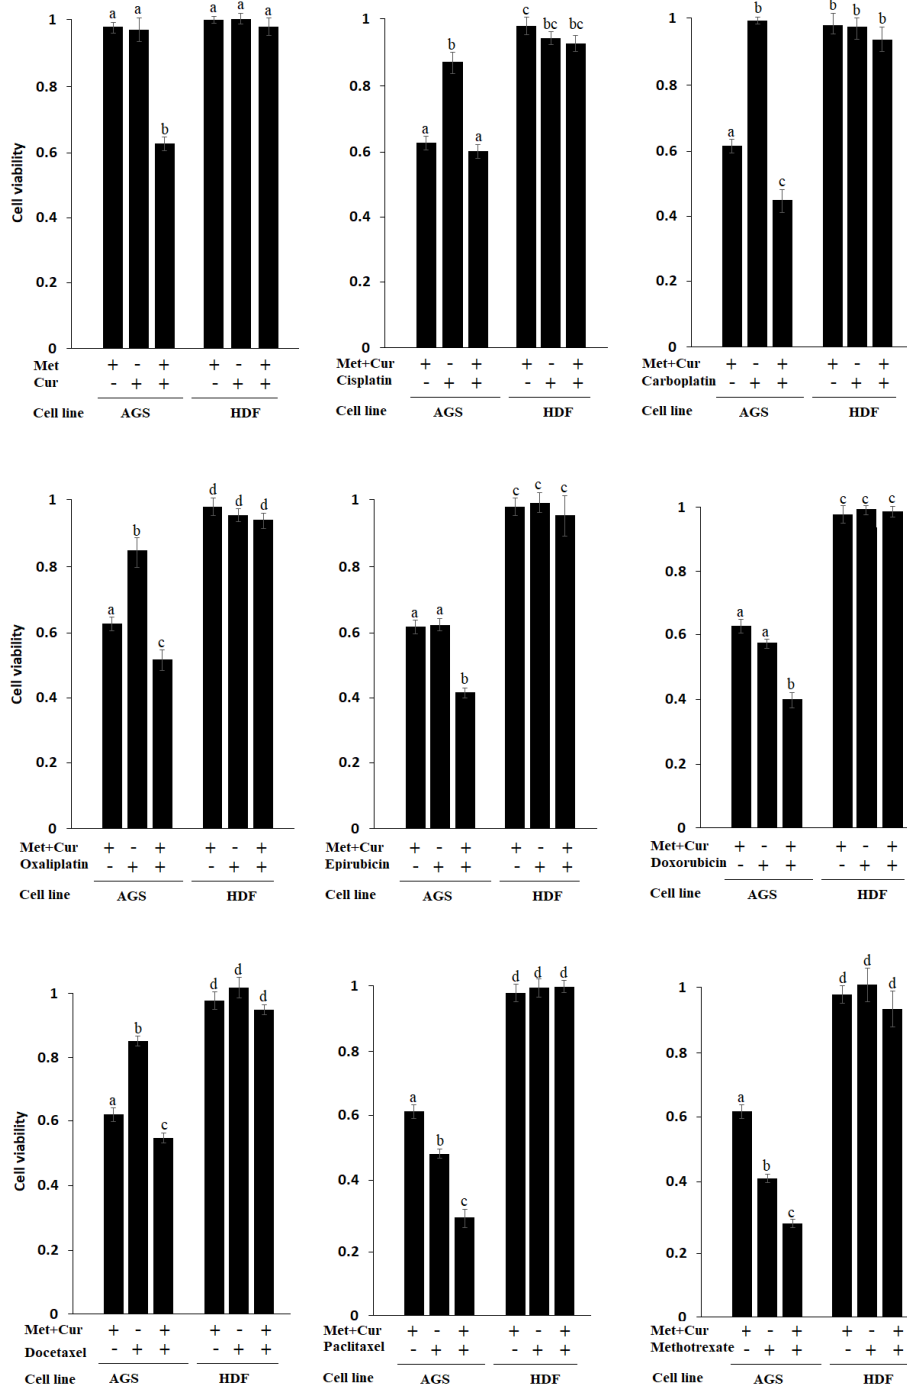

**Supplementary Figure 2:** Treatment of cancerous AGS and normal HDF cells with metformin (Met), curcumin (Cur), Met+Cur, and anticancer drugs (with and without combination of Met+Cur) for 72 hours. Met, Cur, cisplatin, carboplatin, oxaliplatin, epirubicin, doxorubicin, docetaxel, paclitaxel, and methotrexate were used at final concentrations of 0.625 mM, 1 μM, 1.2 μM, 0.4 μM, 0.4 μM, 37 nM, 37 nM, 1.2 μM, 0.4 μM, and 37 nM, respectively. Statistical analysis was performed using one-way ANOVA with Duncan's post-hoc test. Analysis indicates an increase in the specific cytotoxicity of anticancer drugs in the presence of Met+Cur. All experiments were done independently in triplicate. In each panel, a similar alphabet does not imply statistical significance.
