# Supplementary material for: Synergistic effects of metformin and curcumin on cytotoxicity of chemotherapy drugs using a gastric cancer cell line model
Source: PubMed Central journal article supplement (PMC8678059; doi:10.17179/excli2021-4091), 2021-10-11
Supplement: EXCLI-20-1488-s-002.pdf [file EXCLI-20-1488-s-002.pdf]

**Supplementary data to:**

**Original article:**

**SYNERGISTIC EFFECTS OF METFORMIN AND CURCUMIN ON  
CYTOTOXICITY OF CHEMOTHERAPY DRUGS USING A GASTRIC  
CANCER CELL LINE MODEL**

Ehsan Zarei , Youssof Sefidi-Heris, Iraj Saadat \* 

Department of Biology, College of Sciences, Shiraz University, Shiraz, Iran

\* **Corresponding author:** Iraj Saadat, Department of Biology, College of Sciences,  
Shiraz University, Shiraz 71467-13565, Iran. Tel: +98 71 36137435,  
E-mail: [isaadat@shirazu.ac.ir](mailto:isaadat@shirazu.ac.ir)

<http://dx.doi.org/10.17179/excli2021-4091>

This is an Open Access article distributed under the terms of the Creative Commons Attribution License  
(<http://creativecommons.org/licenses/by/4.0/>).

**Raw data of Figure 1A:**

Cell viability of AGS cells exposed to metformin for 24, 48, 72, 96 hours. In each independent biological replication, cell viability was normalized by untreated control cell culture.

| Time | Replicate | Metformin concentration (mM) |       |       |       |       |       |       |       |       |       |       |
|------|-----------|------------------------------|-------|-------|-------|-------|-------|-------|-------|-------|-------|-------|
|      |           | 0*                           | 0.625 | 1.25  | 2.5   | 5     | 10    | 20    | 40    | 80    | 160   | 320   |
| 24 h | 1         | 1                            | 0.994 | 0.977 | 0.969 | 1.010 | 0.863 | 0.883 | 0.779 | 0.713 | 0.414 | 0.107 |
|      | 2         | 1                            | 1.011 | 1.005 | 1.025 | 0.941 | 0.924 | 0.893 | 0.750 | 0.695 | 0.469 | 0.162 |
|      | 3         | 1                            | 0.997 | 1.027 | 0.945 | 0.959 | 0.902 | 0.826 | 0.697 | 0.615 | 0.414 | 0.160 |
| 48 h | 1         | 1                            | 1.014 | 0.960 | 0.942 | 0.895 | 0.845 | 0.717 | 0.667 | 0.454 | 0.337 | 0.115 |
|      | 2         | 1                            | 0.988 | 0.986 | 0.935 | 0.951 | 0.794 | 0.772 | 0.585 | 0.490 | 0.342 | 0.131 |
|      | 3         | 1                            | 0.986 | 0.971 | 0.981 | 0.900 | 0.828 | 0.792 | 0.604 | 0.532 | 0.312 | 0.064 |
| 72 h | 1         | 1                            | 0.958 | 0.931 | 0.927 | 0.900 | 0.733 | 0.576 | 0.381 | 0.324 | 0.195 | 0.068 |
|      | 2         | 1                            | 0.976 | 0.915 | 0.866 | 0.833 | 0.729 | 0.536 | 0.373 | 0.296 | 0.200 | 0.045 |
|      | 3         | 1                            | 0.987 | 0.940 | 0.892 | 0.876 | 0.698 | 0.495 | 0.349 | 0.255 | 0.178 | 0.015 |
| 96 h | 1         | 1                            | 0.507 | 0.321 | 0.347 | 0.314 | 0.200 | 0.129 | 0.129 | 0.044 | 0.044 | 0.044 |
|      | 2         | 1                            | 0.466 | 0.371 | 0.341 | 0.316 | 0.178 | 0.113 | 0.118 | 0.083 | 0.011 | 0.000 |
|      | 3         | 1                            | 0.470 | 0.358 | 0.326 | 0.230 | 0.147 | 0.088 | 0.023 | 0.026 | 0.032 | 0.014 |

\*: Factor values examined were normalized to a dose of zero (control, untreated) and considered as one factor.

**Raw data of Figure 1B:**

Cell viability of AGS cells exposed to curcumin for 24, 48, 72, and 96 hours. In each independent biological replication, cell viability was normalized by untreated control cell culture.

| Time | Replicate | Curcumin concentration ( $\mu\text{M}$ ) |       |       |       |       |       |       |       |       |       |       |       |
|------|-----------|------------------------------------------|-------|-------|-------|-------|-------|-------|-------|-------|-------|-------|-------|
|      |           | 0                                        | 0.5   | 1.0   | 2.0   | 4.0   | 8.0   | 16    | 32    | 64    | 128   | 256   | 512   |
| 24 h | 1         | 1                                        | 0.938 | 1.014 | 0.984 | 0.984 | 0.985 | 0.861 | 0.629 | 0.282 | 0.212 | 0.120 | 0.064 |
|      | 2         | 1                                        | 1.016 | 1.001 | 0.994 | 0.999 | 0.957 | 0.839 | 0.675 | 0.367 | 0.174 | 0.071 | 0.043 |
|      | 3         | 1                                        | 1.061 | 0.997 | 1.006 | 0.978 | 0.933 | 0.844 | 0.693 | 0.340 | 0.192 | 0.098 | 0.028 |
| 48 h | 1         | 1                                        | 0.950 | 0.988 | 0.941 | 0.879 | 0.782 | 0.558 | 0.311 | 0.145 | 0.042 | 0.025 | 0.022 |
|      | 2         | 1                                        | 1.020 | 0.995 | 0.965 | 0.913 | 0.845 | 0.598 | 0.342 | 0.156 | 0.051 | 0.019 | 0.019 |
|      | 3         | 1                                        | 1.028 | 1.011 | 1.015 | 0.979 | 0.838 | 0.653 | 0.403 | 0.219 | 0.051 | 0.019 | 0.010 |
| 72 h | 1         | 1                                        | 0.962 | 0.941 | 0.924 | 0.773 | 0.626 | 0.338 | 0.109 | 0.018 | 0.005 | 0.023 | 0.003 |
|      | 2         | 1                                        | 1.033 | 0.988 | 0.955 | 0.799 | 0.639 | 0.367 | 0.111 | 0.004 | 0.005 | 0.004 | 0.002 |
|      | 3         | 1                                        | 0.994 | 0.974 | 0.949 | 0.847 | 0.562 | 0.352 | 0.093 | 0.004 | 0.011 | 0.002 | 0.008 |
| 96 h | 1         | 1                                        | 1.033 | 0.988 | 0.963 | 0.813 | 0.559 | 0.149 | 0.024 | 0.023 | 0.018 | 0.023 | 0.001 |
|      | 2         | 1                                        | 0.994 | 0.974 | 0.936 | 0.748 | 0.539 | 0.060 | 0.018 | 0.004 | 0.009 | 0.004 | 0.001 |
|      | 3         | 1                                        | 0.996 | 0.968 | 0.949 | 0.781 | 0.549 | 0.104 | 0.021 | 0.009 | 0.004 | 0.009 | 0.001 |

**Raw data of Figure 1C:**

Cell viability of AGS cells exposed to combination of metformin and curcumin for 48 hours. In each independent biological replication, cell viability was normalized by untreated control cell culture.

| Replicate | Metformin (mM) + Curcumin (µM) concentrations |           |        |       |       |       |       |       |       |         |         |
|-----------|-----------------------------------------------|-----------|--------|-------|-------|-------|-------|-------|-------|---------|---------|
|           | 0                                             | 0.625+0.5 | 1.25+1 | 2.5+2 | 5+4   | 10+8  | 20+16 | 40+32 | 80+64 | 160+128 | 320+256 |
| 1         | 1                                             | 0.732     | 0.720  | 0.657 | 0.632 | 0.456 | 0.310 | 0.159 | 0.056 | 0.010   | 0.017   |
| 2         | 1                                             | 0.738     | 0.739  | 0.714 | 0.584 | 0.439 | 0.242 | 0.214 | 0.007 | 0.070   | 0.006   |
| 3         | 1                                             | 0.766     | 0.738  | 0.684 | 0.622 | 0.414 | 0.289 | 0.140 | 0.044 | 0.024   | 0.061   |

**Raw data of Figure 1D:**

Cell viability of AGS cells exposed to combination of metformin and curcumin for 72 hours. In each independent biological replication, cell viability was normalized by untreated control cell culture.

| Replicate | Metformin (mM) + Curcumin (µM) concentrations |         |        |       |       |       |       |       |        |         |         |
|-----------|-----------------------------------------------|---------|--------|-------|-------|-------|-------|-------|--------|---------|---------|
|           | 0                                             | 0.625+1 | 1.25+2 | 2.5+4 | 5+8   | 10+16 | 20+32 | 40+64 | 80+128 | 160+256 | 320+512 |
| 1         | 1                                             | 0.593   | 0.612  | 0.600 | 0.563 | 0.449 | 0.171 | 0.075 | 0.029  | 0.014   | 0.011   |
| 2         | 1                                             | 0.656   | 0.618  | 0.597 | 0.547 | 0.379 | 0.163 | 0.062 | 0.036  | 0.008   | 0.005   |
| 3         | 1                                             | 0.600   | 0.590  | 0.572 | 0.512 | 0.427 | 0.148 | 0.047 | 0.006  | 0.004   | 0.001   |

**Raw data of Figure 2A:**

Migration of AGS cells treated with metformin, curcumin and their combination for 24, 48, and 72 hours in three independent replications was examined through wound healing assay by the aid of ImageJ software.

| Treatment                                          | Repli-<br>cate | Time                                |                           |                         |                                     |                           |                         |                                     |                           |                         |                                     |                           |                         |
|----------------------------------------------------|----------------|-------------------------------------|---------------------------|-------------------------|-------------------------------------|---------------------------|-------------------------|-------------------------------------|---------------------------|-------------------------|-------------------------------------|---------------------------|-------------------------|
|                                                    |                | 0 h                                 |                           |                         | 24 h                                |                           |                         | 48 h                                |                           |                         | 72 h                                |                           |                         |
|                                                    |                | Scratch<br>area<br>(Mega<br>pixels) | Scratch<br>area<br>ratio* | Wound<br>clo-<br>sure** | Scratch<br>area<br>(Mega<br>pixels) | Scratch<br>area<br>ratio* | Wound<br>clo-<br>sure** | Scratch<br>area<br>(Mega<br>pixels) | Scratch<br>area<br>ratio* | Wound<br>clo-<br>sure** | Scratch<br>area<br>(Mega<br>pixels) | Scratch<br>area<br>ratio* | Wound<br>clo-<br>sure** |
| Control                                            | 1              | 2.069                               | 1                         | 0                       | 1.429                               | 0.690                     | 0.310                   | 0.662                               | 0.320                     | 0.680                   | 0.035                               | 0.017                     | 0.983                   |
|                                                    | 2              | 2.069                               | 1                         | 0                       | 1.316                               | 0.636                     | 0.364                   | 0.621                               | 0.300                     | 0.700                   | 0.033                               | 0.016                     | 0.984                   |
|                                                    | 3              | 2.097                               | 1                         | 0                       | 1.419                               | 0.677                     | 0.323                   | 0.753                               | 0.359                     | 0.641                   | 0.041                               | 0.020                     | 0.980                   |
| 0.6 mM<br>Metformin                                | 1              | 1.915                               | 1                         | 0                       | 1.314                               | 0.686                     | 0.314                   | 0.971                               | 0.507                     | 0.493                   | 0.560                               | 0.292                     | 0.708                   |
|                                                    | 2              | 2.112                               | 1                         | 0                       | 1.350                               | 0.639                     | 0.361                   | 0.883                               | 0.418                     | 0.582                   | 0.524                               | 0.248                     | 0.752                   |
|                                                    | 3              | 2.013                               | 1                         | 0                       | 1.409                               | 0.700                     | 0.300                   | 0.927                               | 0.460                     | 0.540                   | 0.643                               | 0.319                     | 0.681                   |
| 1 $\mu$ M<br>Curcumin                              | 1              | 2.093                               | 1                         | 0                       | 1.419                               | 0.678                     | 0.322                   | 0.965                               | 0.461                     | 0.539                   | 0.215                               | 0.103                     | 0.897                   |
|                                                    | 2              | 2.208                               | 1                         | 0                       | 1.496                               | 0.677                     | 0.323                   | 0.934                               | 0.423                     | 0.577                   | 0.264                               | 0.120                     | 0.880                   |
|                                                    | 3              | 2.092                               | 1                         | 0                       | 1.446                               | 0.691                     | 0.309                   | 0.901                               | 0.431                     | 0.569                   | 0.229                               | 0.109                     | 0.891                   |
| 0.6 mM Met-<br>formin + 1<br>$\mu$ M Curcu-<br>min | 1              | 2.212                               | 1                         | 0                       | 1.510                               | 0.683                     | 0.317                   | 1.195                               | 0.540                     | 0.460                   | 0.952                               | 0.430                     | 0.570                   |
|                                                    | 2              | 2.251                               | 1                         | 0                       | 1.529                               | 0.679                     | 0.321                   | 1.123                               | 0.499                     | 0.501                   | 1.037                               | 0.461                     | 0.539                   |
|                                                    | 3              | 2.059                               | 1                         | 0                       | 1.444                               | 0.702                     | 0.298                   | 1.258                               | 0.611                     | 0.389                   | 1.109                               | 0.539                     | 0.461                   |

\* Scratch area ratio in each treatment group = Scratch area at any time  $\div$  Scratch area at 0 h.

\*\* Wound closure= 1- Scratch area ratio

**Raw data of Figure 2B and 2C:**

Cell migration and invasion were inspected via transwell method (without matrigel and with matrigel coating, respectively) 24 hours after treatment with metformin, curcumin and their combination. The colony formation of AGS cells treated with metformin, curcumin and their combination after 12 days were evaluated by counting the number of colonies.

| <b>Treatment</b>                                                 | <b>Replicate</b> | <b>Migrated cell</b> | <b>Invaded cell</b> | <b>Formed colony</b> |
|------------------------------------------------------------------|------------------|----------------------|---------------------|----------------------|
| <b>Control</b>                                                   | <b>1</b>         | 230                  | 170                 | 128                  |
|                                                                  | <b>2</b>         | 206                  | 164                 | 127                  |
|                                                                  | <b>3</b>         | 216                  | 171                 | 131                  |
| <b>0.6 mM<br/>Metformin</b>                                      | <b>1</b>         | 186                  | 85                  | 30                   |
|                                                                  | <b>2</b>         | 179                  | 78                  | 33                   |
|                                                                  | <b>3</b>         | 181                  | 86                  | 31                   |
| <b>1 <math>\mu</math>M<br/>Curcumin</b>                          | <b>1</b>         | 162                  | 38                  | 111                  |
|                                                                  | <b>2</b>         | 146                  | 41                  | 108                  |
|                                                                  | <b>3</b>         | 153                  | 38                  | 107                  |
| <b>0.6 mM Met-<br/>formin + 1 <math>\mu</math>M<br/>Curcumin</b> | <b>1</b>         | 119                  | 21                  | 14                   |
|                                                                  | <b>2</b>         | 102                  | 18                  | 16                   |
|                                                                  | <b>3</b>         | 108                  | 19                  | 13                   |

**Raw data of Figure 3:** Viability of AGS cells after treatment with serial dilutions of anticancer drugs with or without combination of metformin and curcumin for 48 hours. All experiments were carried out independently in triplicate. In each independent biological replication, cell viability was normalized by untreated control cell culture.

| Treatment                                                   | Repli-<br>cate | Cisplatin concentration ( $\mu\text{M}$ ) |       |       |       |       |       |       |
|-------------------------------------------------------------|----------------|-------------------------------------------|-------|-------|-------|-------|-------|-------|
|                                                             |                | 0                                         | 1.2   | 3.7   | 11    | 33    | 100   | 300   |
| Cisplatin                                                   | 1              | 1                                         | 0.905 | 0.830 | 0.740 | 0.403 | 0.111 | 0.085 |
|                                                             | 2              | 1                                         | 0.955 | 0.874 | 0.762 | 0.365 | 0.186 | 0.068 |
|                                                             | 3              | 1                                         | 0.946 | 0.852 | 0.777 | 0.369 | 0.151 | 0.032 |
| Cisplatin + (0.6 mM Metformin + 0.5 $\mu\text{M}$ Curcumin) | 1              | 1                                         | 0.654 | 0.682 | 0.568 | 0.180 | 0.001 | 0.004 |
|                                                             | 2              | 1                                         | 0.695 | 0.690 | 0.585 | 0.172 | 0.043 | 0.011 |
|                                                             | 3              | 1                                         | 0.678 | 0.696 | 0.631 | 0.225 | 0.059 | 0.049 |

| Treatment                                                     | Repli-<br>cate | Carboplatin concentration ( $\mu\text{M}$ ) |       |       |       |       |       |       |
|---------------------------------------------------------------|----------------|---------------------------------------------|-------|-------|-------|-------|-------|-------|
|                                                               |                | 0                                           | 0.4   | 1.2   | 3.7   | 11    | 33    | 100   |
| Carboplatin                                                   | 1              | 1                                           | 0.985 | 1.020 | 0.959 | 0.642 | 0.527 | 0.372 |
|                                                               | 2              | 1                                           | 1.000 | 0.995 | 1.002 | 0.627 | 0.480 | 0.365 |
|                                                               | 3              | 1                                           | 1.010 | 0.973 | 0.953 | 0.741 | 0.542 | 0.319 |
| Carboplatin + (0.6 mM Metformin + 0.5 $\mu\text{M}$ Curcumin) | 1              | 1                                           | 0.745 | 0.747 | 0.652 | 0.561 | 0.447 | 0.292 |
|                                                               | 2              | 1                                           | 0.699 | 0.650 | 0.677 | 0.525 | 0.459 | 0.285 |
|                                                               | 3              | 1                                           | 0.703 | 0.689 | 0.626 | 0.502 | 0.438 | 0.270 |

| Treatment                                                     | Repli-<br>cate | Oxaliplatin concentration ( $\mu\text{M}$ ) |       |       |       |       |       |       |
|---------------------------------------------------------------|----------------|---------------------------------------------|-------|-------|-------|-------|-------|-------|
|                                                               |                | 0                                           | 0.4   | 1.2   | 3.7   | 11    | 33    | 100   |
| Oxaliplatin                                                   | 1              | 1                                           | 0.856 | 0.722 | 0.573 | 0.506 | 0.431 | 0.171 |
|                                                               | 2              | 1                                           | 0.894 | 0.658 | 0.574 | 0.493 | 0.395 | 0.154 |
|                                                               | 3              | 1                                           | 0.885 | 0.631 | 0.539 | 0.475 | 0.427 | 0.133 |
| Oxaliplatin + (0.6 mM Metformin + 0.5 $\mu\text{M}$ Curcumin) | 1              | 1                                           | 0.570 | 0.509 | 0.388 | 0.385 | 0.270 | 0.031 |
|                                                               | 2              | 1                                           | 0.565 | 0.489 | 0.410 | 0.357 | 0.171 | 0.008 |
|                                                               | 3              | 1                                           | 0.596 | 0.480 | 0.357 | 0.332 | 0.209 | 0.105 |

Raw data of Figure 3 (cont.)

| Treatment                                                    | Repli-<br>cate | Epirubicin concentration ( $\mu\text{M}$ ) |             |             |             |          |          |          |
|--------------------------------------------------------------|----------------|--------------------------------------------|-------------|-------------|-------------|----------|----------|----------|
|                                                              |                | <b>0</b>                                   | <b>0.03</b> | <b>0.11</b> | <b>0.33</b> | <b>1</b> | <b>3</b> | <b>9</b> |
| Epirubicin                                                   | <b>1</b>       | 1                                          | 0.687       | 0.608       | 0.331       | 0.290    | 0.263    | 0.200    |
|                                                              | <b>2</b>       | 1                                          | 0.631       | 0.604       | 0.383       | 0.268    | 0.169    | 0.129    |
|                                                              | <b>3</b>       | 1                                          | 0.691       | 0.557       | 0.349       | 0.248    | 0.202    | 0.167    |
| Epirubicin + (0.6 mM Metformin + 0.5 $\mu\text{M}$ Curcumin) | <b>1</b>       | 1                                          | 0.512       | 0.419       | 0.217       | 0.173    | 0.114    | 0.026    |
|                                                              | <b>2</b>       | 1                                          | 0.532       | 0.429       | 0.242       | 0.117    | 0.053    | 0.043    |
|                                                              | <b>3</b>       | 1                                          | 0.543       | 0.364       | 0.283       | 0.047    | 0.084    | 0.052    |

| Treatment                                                     | Repli-<br>cate | Doxorubicin concentration ( $\mu\text{M}$ ) |             |             |             |          |          |          |
|---------------------------------------------------------------|----------------|---------------------------------------------|-------------|-------------|-------------|----------|----------|----------|
|                                                               |                | <b>0</b>                                    | <b>0.03</b> | <b>0.11</b> | <b>0.33</b> | <b>1</b> | <b>3</b> | <b>9</b> |
| Doxorubicin                                                   | <b>1</b>       | 1                                           | 0.837       | 0.719       | 0.593       | 0.099    | 0.132    | 0.024    |
|                                                               | <b>2</b>       | 1                                           | 0.786       | 0.751       | 0.486       | 0.131    | 0.061    | 0.028    |
|                                                               | <b>3</b>       | 1                                           | 0.759       | 0.749       | 0.540       | 0.179    | 0.039    | 0.025    |
| Doxorubicin + (0.6 mM Metformin + 0.5 $\mu\text{M}$ Curcumin) | <b>1</b>       | 1                                           | 0.604       | 0.656       | 0.474       | 0.065    | 0.024    | 0.015    |
|                                                               | <b>2</b>       | 1                                           | 0.583       | 0.622       | 0.446       | 0.052    | 0.027    | 0.008    |
|                                                               | <b>3</b>       | 1                                           | 0.635       | 0.580       | 0.417       | 0.049    | 0.045    | 0.007    |

| Treatment                                                   | Repli-<br>cate | Docetaxel concentration ( $\mu\text{M}$ ) |            |            |           |           |            |            |
|-------------------------------------------------------------|----------------|-------------------------------------------|------------|------------|-----------|-----------|------------|------------|
|                                                             |                | <b>0</b>                                  | <b>1.2</b> | <b>3.7</b> | <b>11</b> | <b>33</b> | <b>100</b> | <b>300</b> |
| Docetaxel                                                   | <b>1</b>       | 1                                         | 0.871      | 0.709      | 0.594     | 0.534     | 0.426      | 0.123      |
|                                                             | <b>2</b>       | 1                                         | 0.937      | 0.677      | 0.563     | 0.428     | 0.399      | 0.172      |
|                                                             | <b>3</b>       | 1                                         | 0.826      | 0.689      | 0.539     | 0.499     | 0.408      | 0.089      |
| Docetaxel + (0.6 mM Metformin + 0.5 $\mu\text{M}$ Curcumin) | <b>1</b>       | 1                                         | 0.509      | 0.530      | 0.435     | 0.402     | 0.205      | 0.105      |
|                                                             | <b>2</b>       | 1                                         | 0.552      | 0.470      | 0.372     | 0.335     | 0.263      | 0.031      |
|                                                             | <b>3</b>       | 1                                         | 0.685      | 0.495      | 0.367     | 0.308     | 0.187      | 0.013      |



Raw data of Figure 3 (cont.)

| Treatment                                                   | Repli-<br>cate | Palitaxel concentration ( $\mu\text{M}$ ) |       |       |       |       |       |       |
|-------------------------------------------------------------|----------------|-------------------------------------------|-------|-------|-------|-------|-------|-------|
|                                                             |                | 0                                         | 0.4   | 1.2   | 3.7   | 11    | 33    | 100   |
| Palitaxel                                                   | 1              | 1                                         | 0.539 | 0.473 | 0.425 | 0.334 | 0.125 | 0.087 |
|                                                             | 2              | 1                                         | 0.511 | 0.490 | 0.428 | 0.324 | 0.120 | 0.035 |
|                                                             | 3              | 1                                         | 0.538 | 0.463 | 0.404 | 0.374 | 0.096 | 0.002 |
| Palitaxel + (0.6 mM Metformin + 0.5 $\mu\text{M}$ Curcumin) | 1              | 1                                         | 0.393 | 0.319 | 0.307 | 0.261 | 0.049 | 0.001 |
|                                                             | 2              | 1                                         | 0.369 | 0.341 | 0.279 | 0.204 | 0.008 | 0.043 |
|                                                             | 3              | 1                                         | 0.384 | 0.296 | 0.262 | 0.232 | 0.006 | 0.003 |

| Treatment                                                      | Repli-<br>cate | Methotrexate concentration ( $\mu\text{M}$ ) |       |       |       |       |       |       |
|----------------------------------------------------------------|----------------|----------------------------------------------|-------|-------|-------|-------|-------|-------|
|                                                                |                | 0                                            | 0.03  | 0.11  | 0.33  | 1     | 3     | 9     |
| Methotrexate                                                   | 1              | 1                                            | 0.463 | 0.447 | 0.446 | 0.424 | 0.383 | 0.368 |
|                                                                | 2              | 1                                            | 0.474 | 0.427 | 0.382 | 0.393 | 0.388 | 0.358 |
|                                                                | 3              | 1                                            | 0.496 | 0.395 | 0.398 | 0.367 | 0.421 | 0.397 |
| Methotrexate + (0.6 mM Metformin + 0.5 $\mu\text{M}$ Curcumin) | 1              | 1                                            | 0.338 | 0.300 | 0.288 | 0.313 | 0.307 | 0.278 |
|                                                                | 2              | 1                                            | 0.367 | 0.320 | 0.299 | 0.288 | 0.286 | 0.234 |
|                                                                | 3              | 1                                            | 0.346 | 0.338 | 0.284 | 0.269 | 0.253 | 0.253 |

**Raw data of Figure 4:**

Cell viability of AGS and HDF cells treated with anticancer drugs alone and in presence of “Metformin + Curcumin” for 48 hours

| Treatments                                          | AGS cells   |             |             | HDF cells   |             |             |
|-----------------------------------------------------|-------------|-------------|-------------|-------------|-------------|-------------|
|                                                     | Replicate 1 | Replicate 2 | Replicate 3 | Replicate 1 | Replicate 2 | Replicate 3 |
| <b>0.6 mM Metformin</b>                             | 1.014       | 0.988       | 0.986       | 0.983       | 0.998       | 0.992       |
| <b>0.5 μM Curcumin</b>                              | 0.950       | 1.020       | 1.028       | 1.004       | 1.014       | 0.997       |
| <b>Metformin + Curcumin*</b>                        | 0.732       | 0.738       | 0.766       | 0.994       | 0.965       | 0.988       |
| <b>1.2 μM Cisplatin</b>                             | 0.905       | 0.955       | 0.946       | 1.005       | 0.971       | 0.956       |
| <b>1.2 μM Cisplatin + Metformin + Curcumin</b>      | 0.654       | 0.695       | 0.678       | 0.980       | 0.963       | 0.949       |
| <b>0.4 μM Carboplatin</b>                           | 0.985       | 1.000       | 1.010       | 0.988       | 1.013       | 0.993       |
| <b>0.4 μM Carboplatin + Metformin + Curcumin</b>    | 0.745       | 0.699       | 0.703       | 0.977       | 0.991       | 0.981       |
| <b>0.4 μM Oxaliplatin</b>                           | 0.856       | 0.894       | 0.885       | 1.002       | 1.016       | 0.987       |
| <b>0.4 μM Oxaliplatin + Metformin + Curcumin</b>    | 0.570       | 0.565       | 0.596       | 1.004       | 0.995       | 0.970       |
| <b>0.037 μM Epirubicin</b>                          | 0.687       | 0.631       | 0.691       | 0.980       | 1.025       | 1.018       |
| <b>0.037 μM Epirubicin + Metformin + Curcumin</b>   | 0.512       | 0.532       | 0.543       | 1.024       | 1.018       | 1.029       |
| <b>0.037 μM Doxorubicin</b>                         | 0.837       | 0.786       | 0.759       | 0.972       | 1.021       | 1.028       |
| <b>0.037 μM Doxorubicin + Metformin + Curcumin</b>  | 0.604       | 0.583       | 0.635       | 1.015       | 0.985       | 1.004       |
| <b>1.2 μM Docetaxel</b>                             | 0.871       | 0.937       | 0.826       | 0.983       | 1.007       | 1.011       |
| <b>1.2 μM Docetaxel + Metformin + Curcumin</b>      | 0.509       | 0.552       | 0.685       | 1.032       | 1.040       | 1.027       |
| <b>0.4 μM Paclitaxel</b>                            | 0.539       | 0.511       | 0.538       | 0.983       | 0.982       | 0.993       |
| <b>0.4 μM Paclitaxel + Metformin + Curcumin</b>     | 0.393       | 0.369       | 0.384       | 1.000       | 0.996       | 0.989       |
| <b>0.037 μM Methotrexate</b>                        | 0.463       | 0.474       | 0.496       | 1.001       | 0.997       | 0.987       |
| <b>0.037 μM Methotrexate + Metformin + Curcumin</b> | 0.338       | 0.367       | 0.346       | 1.004       | 0.981       | 1.018       |

\*Data of Metformin + Curcumin was used for comparison in each anticancer drug.

**Raw data of Supplementary Figure 1:** Viability of AGS cells after treatment with serial dilutions of anticancer drugs with or without combination of metformin and curcumin for 72 hours. All experiments were carried out independently in triplicate. In each independent biological replication, cell viability was normalized by untreated control cell culture.

| Treatment                                                              | Repl-<br>cate | Cisplatin concentration ( $\mu\text{M}$ ) |       |       |       |       |       |       |
|------------------------------------------------------------------------|---------------|-------------------------------------------|-------|-------|-------|-------|-------|-------|
|                                                                        |               | 0                                         | 1.2   | 3.7   | 11    | 33    | 100   | 300   |
| Cisplatin                                                              | 1             | 1                                         | 0.912 | 0.769 | 0.593 | 0.135 | 0.009 | 0.007 |
|                                                                        | 2             | 1                                         | 0.885 | 0.715 | 0.539 | 0.169 | 0.020 | 0.001 |
|                                                                        | 3             | 1                                         | 0.846 | 0.736 | 0.633 | 0.150 | 0.024 | 0.006 |
| Cisplatin +<br>(0.6 mM Metfor-<br>min + 0.5 $\mu\text{M}$<br>Curcumin) | 1             | 1                                         | 0.641 | 0.604 | 0.471 | 0.069 | 0.030 | 0.023 |
|                                                                        | 2             | 1                                         | 0.565 | 0.535 | 0.428 | 0.099 | 0.004 | 0.013 |
|                                                                        | 3             | 1                                         | 0.599 | 0.582 | 0.370 | 0.077 | 0.001 | 0.010 |

| Treatment                                                                | Repl-<br>cate | Carboplatin concentration ( $\mu\text{M}$ ) |       |       |       |       |       |       |
|--------------------------------------------------------------------------|---------------|---------------------------------------------|-------|-------|-------|-------|-------|-------|
|                                                                          |               | 0                                           | 0.4   | 1.2   | 3.7   | 11    | 33    | 100   |
| Carboplatin                                                              | 1             | 1                                           | 0.994 | 0.940 | 0.938 | 0.617 | 0.377 | 0.327 |
|                                                                          | 2             | 1                                           | 0.989 | 0.915 | 0.877 | 0.619 | 0.559 | 0.343 |
|                                                                          | 3             | 1                                           | 0.984 | 1.028 | 0.975 | 0.609 | 0.502 | 0.314 |
| Carboplatin +<br>(0.6 mM Metfor-<br>min + 0.5 $\mu\text{M}$<br>Curcumin) | 1             | 1                                           | 0.449 | 0.414 | 0.406 | 0.321 | 0.242 | 0.139 |
|                                                                          | 2             | 1                                           | 0.489 | 0.481 | 0.448 | 0.299 | 0.246 | 0.162 |
|                                                                          | 3             | 1                                           | 0.492 | 0.438 | 0.411 | 0.295 | 0.265 | 0.151 |

| Treatment                                                                | Repl-<br>cate | Oxaliplatin concentration ( $\mu\text{M}$ ) |       |       |       |       |       |       |
|--------------------------------------------------------------------------|---------------|---------------------------------------------|-------|-------|-------|-------|-------|-------|
|                                                                          |               | 0                                           | 0.4   | 1.2   | 3.7   | 11    | 33    | 100   |
| Oxaliplatin                                                              | 1             | 1                                           | 0.822 | 0.616 | 0.443 | 0.436 | 0.335 | 0.083 |
|                                                                          | 2             | 1                                           | 0.824 | 0.607 | 0.527 | 0.429 | 0.327 | 0.059 |
|                                                                          | 3             | 1                                           | 0.927 | 0.597 | 0.465 | 0.466 | 0.284 | 0.127 |
| Oxaliplatin +<br>(0.6 mM Metfor-<br>min + 0.5 $\mu\text{M}$<br>Curcumin) | 1             | 1                                           | 0.533 | 0.434 | 0.340 | 0.302 | 0.176 | 0.026 |
|                                                                          | 2             | 1                                           | 0.510 | 0.449 | 0.302 | 0.281 | 0.196 | 0.003 |
|                                                                          | 3             | 1                                           | 0.474 | 0.455 | 0.375 | 0.313 | 0.150 | 0.001 |

Raw data of Supplementary Figure 1 (cont.)

| Treatment                                                    | Repli-<br>cate | Epirubicin concentration ( $\mu\text{M}$ ) |       |       |       |       |       |       |
|--------------------------------------------------------------|----------------|--------------------------------------------|-------|-------|-------|-------|-------|-------|
|                                                              |                | 0                                          | 0.03  | 0.11  | 0.33  | 1     | 3     | 9     |
| Epirubicin                                                   | 1              | 1                                          | 0.609 | 0.505 | 0.295 | 0.157 | 0.108 | 0.098 |
|                                                              | 2              | 1                                          | 0.568 | 0.450 | 0.250 | 0.155 | 0.108 | 0.097 |
|                                                              | 3              | 1                                          | 0.682 | 0.470 | 0.271 | 0.150 | 0.110 | 0.083 |
| Epirubicin + (0.6 mM Metformin + 0.5 $\mu\text{M}$ Curcumin) | 1              | 1                                          | 0.416 | 0.327 | 0.116 | 0.031 | 0.028 | 0.012 |
|                                                              | 2              | 1                                          | 0.398 | 0.294 | 0.178 | 0.042 | 0.035 | 0.005 |
|                                                              | 3              | 1                                          | 0.431 | 0.339 | 0.114 | 0.057 | 0.023 | 0.014 |

| Treatment                                                     | Repli-<br>cate | Doxorubicin concentration ( $\mu\text{M}$ ) |       |       |       |       |       |       |
|---------------------------------------------------------------|----------------|---------------------------------------------|-------|-------|-------|-------|-------|-------|
|                                                               |                | 0                                           | 0.03  | 0.11  | 0.33  | 1     | 3     | 9     |
| Doxorubicin                                                   | 1              | 1                                           | 0.561 | 0.498 | 0.246 | 0.012 | 0.007 | 0.001 |
|                                                               | 2              | 1                                           | 0.578 | 0.518 | 0.269 | 0.008 | 0.010 | 0.009 |
|                                                               | 3              | 1                                           | 0.592 | 0.550 | 0.259 | 0.003 | 0.002 | 0.000 |
| Doxorubicin + (0.6 mM Metformin + 0.5 $\mu\text{M}$ Curcumin) | 1              | 1                                           | 0.374 | 0.399 | 0.278 | 0.026 | 0.006 | 0.004 |
|                                                               | 2              | 1                                           | 0.399 | 0.383 | 0.183 | 0.005 | 0.016 | 0.001 |
|                                                               | 3              | 1                                           | 0.424 | 0.358 | 0.244 | 0.014 | 0.005 | 0.007 |

| Treatment                                                   | Repli-<br>cate | Docetaxel concentration ( $\mu\text{M}$ ) |       |       |       |       |       |       |
|-------------------------------------------------------------|----------------|-------------------------------------------|-------|-------|-------|-------|-------|-------|
|                                                             |                | 0                                         | 1.2   | 3.7   | 11    | 33    | 100   | 300   |
| Docetaxel                                                   | 1              | 1                                         | 0.870 | 0.658 | 0.465 | 0.480 | 0.357 | 0.040 |
|                                                             | 2              | 1                                         | 0.852 | 0.569 | 0.487 | 0.428 | 0.309 | 0.092 |
|                                                             | 3              | 1                                         | 0.884 | 0.589 | 0.478 | 0.414 | 0.270 | 0.114 |
| Docetaxel + (0.6 mM Metformin + 0.5 $\mu\text{M}$ Curcumin) | 1              | 1                                         | 0.551 | 0.433 | 0.320 | 0.280 | 0.135 | 0.000 |
|                                                             | 2              | 1                                         | 0.544 | 0.408 | 0.357 | 0.370 | 0.179 | 0.054 |
|                                                             | 3              | 1                                         | 0.507 | 0.458 | 0.334 | 0.240 | 0.198 | 0.012 |

Raw data of Supplementary Figure 1 (cont.)

| Treatment                                                 | Repli-<br>cate | Palitaxel concentration ( $\mu\text{M}$ ) |       |       |       |       |       |       |
|-----------------------------------------------------------|----------------|-------------------------------------------|-------|-------|-------|-------|-------|-------|
|                                                           |                | 0                                         | 0.4   | 1.2   | 3.7   | 11    | 33    | 100   |
| Palitaxel                                                 | 1              | 1                                         | 0.451 | 0.426 | 0.377 | 0.303 | 0.052 | 0.026 |
|                                                           | 2              | 1                                         | 0.502 | 0.442 | 0.328 | 0.328 | 0.091 | 0.031 |
|                                                           | 3              | 1                                         | 0.500 | 0.358 | 0.298 | 0.199 | 0.073 | 0.011 |
| Palitaxel + (0.6 mM Metformin + 1 $\mu\text{M}$ Curcumin) | 1              | 1                                         | 0.298 | 0.220 | 0.169 | 0.174 | 0.008 | 0.009 |
|                                                           | 2              | 1                                         | 0.321 | 0.278 | 0.255 | 0.154 | 0.002 | 0.006 |
|                                                           | 3              | 1                                         | 0.264 | 0.224 | 0.209 | 0.143 | 0.001 | 0.002 |

| Treatment                                                    | Repli-<br>cate | Methotrexate concentration ( $\mu\text{M}$ ) |       |       |       |       |       |       |
|--------------------------------------------------------------|----------------|----------------------------------------------|-------|-------|-------|-------|-------|-------|
|                                                              |                | 0                                            | 0.03  | 0.11  | 0.33  | 1     | 3     | 9     |
| Methotrexate                                                 | 1              | 1                                            | 0.380 | 0.334 | 0.349 | 0.367 | 0.336 | 0.334 |
|                                                              | 2              | 1                                            | 0.424 | 0.360 | 0.327 | 0.316 | 0.308 | 0.302 |
|                                                              | 3              | 1                                            | 0.427 | 0.366 | 0.320 | 0.284 | 0.288 | 0.298 |
| Methotrexate + (0.6 mM Metformin + 1 $\mu\text{M}$ Curcumin) | 1              | 1                                            | 0.249 | 0.251 | 0.228 | 0.208 | 0.190 | 0.182 |
|                                                              | 2              | 1                                            | 0.279 | 0.257 | 0.219 | 0.198 | 0.196 | 0.173 |
|                                                              | 3              | 1                                            | 0.274 | 0.232 | 0.211 | 0.231 | 0.216 | 0.203 |

**Raw data of Supplementary Figure 2:**

Cell viability of AGS and HDF cells treated with anticancer drugs alone and in presence of “Metformin + Curcumin” for 72 hours

| Treatments                                          | AGS cells   |             |             | HDF cells   |             |             |
|-----------------------------------------------------|-------------|-------------|-------------|-------------|-------------|-------------|
|                                                     | Replicate 1 | Replicate 2 | Replicate 3 | Replicate 1 | Replicate 2 | Replicate 3 |
| <b>0.6 mM Metformin</b>                             | 0.958       | 0.976       | 0.987       | 0.988       | 0.994       | 0.974       |
| <b>1 μM Curcumin</b>                                | 0.941       | 0.988       | 0.974       | 0.996       | 0.997       | 0.972       |
| <b>Metformin + Curcumin*</b>                        | 0.593       | 0.656       | 0.600       | 1.020       | 0.954       | 0.926       |
| <b>1.2 μM Cisplatin</b>                             | 0.912       | 0.885       | 0.846       | 0.933       | 0.915       | 0.952       |
| <b>1.2 μM Cisplatin + Metformin + Curcumin</b>      | 0.622       | 0.584       | 0.599       | 0.935       | 0.893       | 0.925       |
| <b>0.4 μM Carboplatin</b>                           | 0.994       | 0.989       | 0.984       | 0.933       | 0.960       | 0.997       |
| <b>0.4 μM Carboplatin + Metformin + Curcumin</b>    | 0.449       | 0.489       | 0.492       | 0.966       | 0.904       | 0.911       |
| <b>0.4 μM Oxaliplatin</b>                           | 0.822       | 0.824       | 0.927       | 0.914       | 0.946       | 0.969       |
| <b>0.4 μM Oxaliplatin + Metformin + Curcumin</b>    | 0.533       | 0.510       | 0.474       | 0.942       | 0.946       | 0.903       |
| <b>0.037 μM Epirubicin</b>                          | 0.609       | 0.568       | 0.682       | 0.984       | 1.012       | 0.938       |
| <b>0.037 μM Epirubicin + Metformin + Curcumin</b>   | 0.416       | 0.398       | 0.431       | 0.898       | 0.924       | 1.009       |
| <b>0.037 μM Doxorubicin</b>                         | 0.561       | 0.578       | 0.592       | 0.998       | 0.977       | 1.008       |
| <b>0.037 μM Doxorubicin + Metformin + Curcumin</b>  | 0.374       | 0.399       | 0.424       | 0.917       | 0.986       | 0.964       |
| <b>1.2 μM Docetaxel</b>                             | 0.870       | 0.852       | 0.884       | 1.015       | 1.050       | 0.950       |
| <b>1.2 μM Docetaxel+ Metformin + Curcumin</b>       | 0.551       | 0.544       | 0.507       | 0.937       | 0.957       | 0.930       |
| <b>0.4 μM Paclitaxel</b>                            | 0.451       | 0.502       | 0.500       | 1.019       | 0.954       | 0.967       |
| <b>0.4 μM Paclitaxel + Metformin + Curcumin</b>     | 0.298       | 0.321       | 0.264       | 0.965       | 0.995       | 0.992       |
| <b>0.037 μM Methotrexate</b>                        | 0.397       | 0.444       | 0.427       | 1.052       | 1.000       | 0.928       |
| <b>0.037 μM Methotrexate + Metformin + Curcumin</b> | 0.249       | 0.279       | 0.274       | 0.928       | 0.975       | 0.876       |

\*Data of Metformin + Curcumin was used for comparison in each anticancer drug.

**Raw data of Table 1:**

Investigation of the synergistic effect (Cytotoxicity = 1- viability) of combination treatment of metformin and curcumin on AGS cells. Cell viability inhibition was evaluated after 48 hours of single and combination treatment of metformin and curcumin. Data was analyzed by CompuSyn software.

| Treatments                       | Replicate 1 | Replicate 2 | Replicate 3 | Average* |
|----------------------------------|-------------|-------------|-------------|----------|
| <b>Metformin (μM)</b>            |             |             |             |          |
| 625                              | 0.000       | 0.005       | 0.007       | 0.004    |
| 1250                             | 0.040       | 0.014       | 0.029       | 0.028    |
| 2500                             | 0.058       | 0.065       | 0.019       | 0.047    |
| 5000                             | 0.105       | 0.049       | 0.100       | 0.085    |
| 10000                            | 0.155       | 0.206       | 0.172       | 0.178    |
| 20000                            | 0.283       | 0.228       | 0.208       | 0.240    |
| 40000                            | 0.333       | 0.415       | 0.396       | 0.381    |
| 80000                            | 0.546       | 0.510       | 0.468       | 0.508    |
| 160000                           | 0.663       | 0.658       | 0.688       | 0.670    |
| 320000                           | 0.885       | 0.869       | 0.936       | 0.897    |
| <b>Curcumin (μM)</b>             |             |             |             |          |
| 0.5                              | 0.001       | 0.002       | 0.000       | 0.001    |
| 1                                | 0.000       | 0.004       | 0.002       | 0.002    |
| 2                                | 0.039       | 0.025       | 0.015       | 0.026    |
| 4                                | 0.121       | 0.087       | 0.021       | 0.076    |
| 8                                | 0.218       | 0.155       | 0.162       | 0.178    |
| 16                               | 0.442       | 0.402       | 0.347       | 0.397    |
| 32                               | 0.689       | 0.658       | 0.597       | 0.648    |
| 64                               | 0.855       | 0.844       | 0.781       | 0.827    |
| 128                              | 0.958       | 0.949       | 0.949       | 0.952    |
| 256                              | 0.975       | 0.981       | 0.981       | 0.979    |
| <b>Metformin + Curcumin (μM)</b> |             |             |             |          |
| 625 + 0.5                        | 0.268       | 0.262       | 0.234       | 0.255    |
| 1250 + 1                         | 0.280       | 0.261       | 0.262       | 0.268    |
| 2500 + 2                         | 0.343       | 0.286       | 0.316       | 0.315    |
| 5000 + 4                         | 0.368       | 0.416       | 0.378       | 0.387    |
| 10000 + 8                        | 0.544       | 0.561       | 0.586       | 0.564    |
| 20000 + 16                       | 0.690       | 0.758       | 0.711       | 0.720    |
| 40000 + 32                       | 0.841       | 0.786       | 0.860       | 0.829    |
| 80000 + 64                       | 0.944       | 0.993       | 0.956       | 0.964    |
| 160000 + 128                     | 0.990       | 0.930       | 0.976       | 0.965    |
| 320000 + 256                     | 0.983       | 0.994       | 0.939       | 0.972    |

\*Average values were used for analysis.

**Raw data of Table 1 (cont.)**

Investigation of the synergistic effect (Cytotoxicity = 1- viability) of combination treatment of metformin and curcumin on AGS cells. Cell viability inhibition was evaluated after 72 hours of single and combination treatment of metformin and curcumin. Data was analyzed by CompuSyn software.

| <b>Treatments</b>                | <b>Replicate 1</b> | <b>Replicate 2</b> | <b>Replicate 3</b> | <b>Average*</b> |
|----------------------------------|--------------------|--------------------|--------------------|-----------------|
| <b>Metformin (μM)</b>            |                    |                    |                    |                 |
| <b>625</b>                       | 0.042              | 0.024              | 0.013              | 0.026           |
| <b>1250</b>                      | 0.069              | 0.085              | 0.060              | 0.071           |
| <b>2500</b>                      | 0.073              | 0.134              | 0.108              | 0.105           |
| <b>5000</b>                      | 0.100              | 0.167              | 0.124              | 0.130           |
| <b>10000</b>                     | 0.267              | 0.271              | 0.302              | 0.280           |
| <b>20000</b>                     | 0.424              | 0.464              | 0.505              | 0.464           |
| <b>40000</b>                     | 0.619              | 0.627              | 0.651              | 0.632           |
| <b>80000</b>                     | 0.676              | 0.704              | 0.745              | 0.708           |
| <b>160000</b>                    | 0.805              | 0.800              | 0.822              | 0.809           |
| <b>320000</b>                    | 0.932              | 0.955              | 0.985              | 0.957           |
| <b>Curcumin (μM)</b>             |                    |                    |                    |                 |
| <b>1</b>                         | 0.059              | 0.012              | 0.026              | 0.032           |
| <b>2</b>                         | 0.076              | 0.045              | 0.051              | 0.057           |
| <b>4</b>                         | 0.227              | 0.201              | 0.153              | 0.194           |
| <b>8</b>                         | 0.374              | 0.361              | 0.438              | 0.391           |
| <b>16</b>                        | 0.662              | 0.633              | 0.648              | 0.648           |
| <b>32</b>                        | 0.891              | 0.889              | 0.907              | 0.896           |
| <b>64</b>                        | 0.982              | 0.996              | 0.996              | 0.991           |
| <b>128</b>                       | 0.995              | 0.995              | 0.989              | 0.993           |
| <b>256</b>                       | 0.977              | 0.996              | 0.998              | 0.990           |
| <b>512</b>                       | 0.997              | 0.998              | 0.992              | 0.996           |
| <b>Metformin + Curcumin (μM)</b> |                    |                    |                    |                 |
| <b>625 + 1</b>                   | 0.407              | 0.344              | 0.400              | 0.384           |
| <b>1250 + 2</b>                  | 0.388              | 0.382              | 0.410              | 0.393           |
| <b>2500 + 4</b>                  | 0.400              | 0.403              | 0.428              | 0.410           |
| <b>5000 + 8</b>                  | 0.437              | 0.453              | 0.488              | 0.459           |
| <b>10000 + 16</b>                | 0.551              | 0.621              | 0.573              | 0.582           |
| <b>20000 + 32</b>                | 0.829              | 0.837              | 0.852              | 0.839           |
| <b>40000 + 64</b>                | 0.925              | 0.938              | 0.953              | 0.939           |
| <b>80000 + 128</b>               | 0.971              | 0.964              | 0.994              | 0.976           |
| <b>160000 + 256</b>              | 0.986              | 0.992              | 0.996              | 0.991           |
| <b>320000 + 512</b>              | 0.989              | 0.995              | 0.999              | 0.994           |

\*Average values were used for analysis.
